# Supplementary material for: Conjugated macro–microporous polymer films bearing tetraphenylethylenes for the enhanced sensing of nitrotoluenes
Source: Royal Society of Chemistry journal article supplement (doi:10.1039/c8ta06744a), 2018-01-01
Supplement: c8ta06744a1.pdf [file c8ta06744a1.pdf]

## *Electronic Supplementary Information*

### **Conjugated Macro-Microporous Polymer Films Bearing Tetraphenylethylenes for the Enhanced Sensing of Nitrotoluenes**

Chang Wan Kang,<sup>†,‡</sup> Doo Hun Lee,<sup>†,‡</sup> Young Jun Shin,<sup>†</sup> Jaewon Choi,<sup>○</sup> Yoon-Joo Ko,<sup>∞</sup>  
Sang Moon Lee,<sup>§</sup> Hae Jin Kim,<sup>§</sup> Kyoung Chul Ko,<sup>Δ\*</sup> and Seung Uk Son<sup>†,\*</sup>

<sup>†</sup> Department of Chemistry, Sungkyunkwan University, Suwon 16419, Korea

<sup>○</sup> Jeonbuk Institute of Advanced Composite Materials, Korea Institute of Science and Technology, Jeonbuk-do 55324, Korea

<sup>∞</sup> Laboratory of Nuclear Magnetic Resonance, National Center for Inter-University Research Facilities (NCIRF),  
Seoul National University, Seoul 08826, Korea

<sup>§</sup> Korea Basic Science Institute, Daejeon 34133, Korea

<sup>Δ</sup> Department of Chemistry Education, Chonnam National University, Gwangju 61186, Korea

E-mail address of corresponding author: [sson@skku.edu](mailto:sson@skku.edu), [kcho1982@jnu.ac.kr](mailto:kcho1982@jnu.ac.kr)

#### ***Experimental Sections***

Scanning electron microscopy (SEM) and transmission electron microscopy (TEM) images were obtained using a JSM6700F and a JEOL 2100F, respectively. Powder X-ray diffraction (PXRD) patterns were obtained using a Rigaku MAX-2200. The surface areas were obtained through the analysis of N<sub>2</sub> adsorption-desorption isotherm curves obtained at 77K using a Micromeritics ASAP2020. Pore size distribution was analyzed by the density functional theory (DFT) method. Thermogravimetric analysis (TGA) was conducted using under N<sub>2</sub> using a Seiko Exstar 7300. Infrared absorption spectra were obtained using a Bruker VERTEX 70 FT-IR spectrometer. UV/visible absorption spectra were obtained through diffuse reflectance spectroscopy using a SHIMADZU UN-3600. The emission spectra were obtained using a JASCO FP-6200. Solid state <sup>13</sup>C nuclear magnetic resonance spectroscopy (NMR) was conducted at CP-TOSS mode using a 500 MHz Bruker ADVANCE II NMR equipment at the NCIRF of Seoul National University. A 4 mm magic angle spinning probe was used with a spinning rate of 5 kHz.

#### ***Synthetic procedure for MA-CMP-F and control CMP-F***

Silica spheres with an average diameter of 400 nm were prepared by the Stöber method.<sup>1</sup> In our work, the synthetic procedures were as follows. Ethanol (200 mL), water (23.5 mL), and ammonia solution (28-30%, 7 mL) were added to a 250 mL round bottomed flask. The solution was stirred at 600 rpm for 10 min. After tetraethylorthosilicate (TEOS, 17.5 mL, 74.2 mmol) was added to solution, the mixture was stirred with 600 rpm at room temperature for 18 h. The silica spheres were retrieved by centrifugation, washed with a 1:1 mixture of methanol and ethanol three times, and dried under vacuum. A slide glass plate (7.5 cm × 2.5 cm × 0.1 cm, Paul Marienfeld GmbH & Co.) was washed through sonication for 1 h in a mixture of 37% HCl (50 mL) and water (450 mL) in a 500 mL beaker. After the glass plate was washed with distilled water until the neutralization was confirmed, it was dried using N<sub>2</sub> flush. Silica spheres (0.30 g) were added to ethanol (60 mL) in a 70 mL vial and sonicated for 6 h. After the glass plate was added to the vial containing silica spheres, the

setting was added to oven at 50°C. After 4 days, the assembled silica spheres on the glass plate were obtained.

1,1,2,2-Tetra(4-bromophenyl)ethane and 1,1,2,2-tetra(4-ethynylphenyl)ethane were prepared by the synthetic procedures in the literature.<sup>2</sup> The glass plate with assembled silica spheres (the plate was cut to the size of 6 cm × 2.5 cm) was added to a Rodaviss glassware (100 mL). After (PPh<sub>3</sub>)<sub>2</sub>PdCl<sub>2</sub> (3.4 mg, 4.8 μmol), CuI (0.9 mg, 4.8 μmol), triethylamine (TEA, 30 mL), and toluene (20 mL) were added to the Rodaviss glassware, the mixture was stirred at 600 rpm for 1 h. The 1,1,2,2-tetra(4-bromophenyl)ethane (31 mg, 48 μmol) and 1,1,2,2-tetra(4-ethynylphenyl)ethane (21 mg, 48 μmol) were dissolved in toluene (3 mL). After the solution was added to the Rodaviss glassware, the mixture was stirred at 600 rpm for 10 min and heated at 80°C overnight *without stirring*. After being cooled to room temperature, the SiO<sub>2</sub>@CMP/glass plate was taken out, washed with ethanol (100 mL) three times, and dried in an oven at 50°C for 3 h. For the etching of silica spheres, the SiO<sub>2</sub>@CMP/glass plate was added to 10% HF aqueous solution (50 mL) in a square dish. The separated glass plate was removed after ~1 min. After the resultant MA-CMP-F was further treated with the HF solution for additional 2 h, it was washed with ethanol (100 mL) three times. The MA-CMP-F was transferred to polytetrafluoroethylene film (PTFE, thickness of 0.1 mm, Sigma Aldrich Co.) and dried in an oven at 80°C for 1 h.

For the preparation of control CMP-F, the same synthetic procedures as those of MA-CMP-F were applied except using TLC plate (Silica gel 60 F<sub>254</sub> 25 aluminium sheets, Merck Milipore) with size of 6 cm × 2.5 cm instead of the glass plate with assembled silica spheres. In addition, ~ a half amount (24 ~ 28 μmol) of the 1,1,2,2-tetra(4-bromophenyl)ethane and 1,1,2,2-tetra(4-ethynylphenyl)ethane were used. Based on the experimental characterization of thickness of control CMP-F by SEM analysis, the CMP-F with a thickness of 2.3 μm was used for the sensing tests. The other synthetic procedures for CMP-F were the same as those for MA-CMP-F.

### ***Synthetic procedure for MA-CMP-F bearing porphyrins in Figure 5<sup>3</sup>***

Tetra(4-ethynylphenyl)porphyrin and tetra(4-ethynylphenyl) Cr-Cl porphyrin were prepared by the synthetic procedures in the literature.<sup>4,5</sup> The glass plate with assembled silica spheres (the plate was cut to the size of 6 cm × 2.5 cm) was added to a Rodaviss glassware (100 mL). After (PPh<sub>3</sub>)<sub>2</sub>PdCl<sub>2</sub> (1.3 mg, 1.9 μmol), CuI (0.3 mg, 1.6 μmol), and triethylamine (TEA, 10 mL) were added to a 10 mL vial, the solution was sonicated for 1 min and then, added to the Rodaviss glassware. After toluene (40 mL) was added to the Rodaviss glassware, the mixture was stirred for 2 h. Tetra(4-ethynylphenyl)porphyrin (25 mg, 35 μmol) and 1,4-diiodobenzene (23 mg, 70 μmol) were dissolved in THF (5 mL). After the solution was added to the Rodaviss glassware, the mixture was stirred at 600 rpm for 10 min and heated at 90°C overnight *without stirring*. After being cooled to room temperature, the SiO<sub>2</sub>@CMP/glass plate was taken out, washed with ethanol (100 mL) three times, and dried in an oven at 50°C for 3 h. For the etching of silica spheres, the SiO<sub>2</sub>@CMP/glass plate was added to 7.5% HF aqueous solution (50 mL) in a square dish. The separated glass plate was removed after ~1 min. After the

resultant MA-CMP-F was further treated with the HF solution for additional 2 h, it was washed with a mixture of methanol and water (100 mL) three times. The MA-CMP-F containing metal-free porphyrin was transferred to polytetrafluoroethylene film (PTFE, thickness of 0.1 mm, Sigma Aldrich Co.) and dried in an oven at 80°C for 1 h. For the preparation of MA-CMP-F containing Cr-F porphyrins, tetra(4-ethynylphenyl) Cr-Cl porphyrin (35  $\mu$ mol) was used instead of tetra(4-ethynylphenyl) porphyrin. During the silica etching by HF, the Cr-Cl species in porphyrins were converted to Cr-F species, as reported in the literature.<sup>5</sup>

### ***Experimental procedure of sensing tests***

The sensing tests were conducted using MA-CMP-F or CMP-F with a size of 0.5 cm  $\times$  1 cm. The MA-CMP-F and CMP-F on the PTFE film were transferred to a slide glass plate and attached with a double side tape. DNT, 4NT, 2NT, 4CT, and T solution with concentrations of 0, 0.0025, 0.0050, 0.010, 0.15, 0.020, 0.050, 0.125, and 0.50 mM were prepared in ethanol. Each solution of 3 mL was used for the sensing tests. The emission intensity changes at 517 and 525 nm for MA-CMP-F and CMP-F, respectively, were measured using a JASCO FP-6200. Considering the conventional range of visible light, the excitation wavelength was fixed to 410 nm. After the MA-CMP-F and CMP-F on the glass plates were added to ethanol and left for 2 h until the system reached equilibrium with no changes of emission intensity, the solution was replaced with that with analytes. After leaving the system for 1 h, the changes of emission intensities were measured.  $K_{sv}$  values were measured by plotting  $I_0/I$  vs  $[M]$ ; the Stern-Volmer plot ( $I_0/I = K_{sv}[M] + 1$ ,  $I_0$ : the original emission intensity,  $I$ : the intensity of emission in the presence of analytes,  $M$ : the concentration of substrates in water,  $R^2 > 0.99$  for linear regression) Recycling tests were conducted using 0 mM and 0.50 mM solutions of 4NT alternatively. Before each sensing cycle for 4 NT, the retrieved MA-CMP-F was washed with excess ethanol three times.

### ***Procedure for computational simulation (Figures S3-5)***

In order to shed light on the emission quenching behaviors of MA-CMP-F by nitrotoluenes, we performed the density functional theory (DFT) calculations on the HOMO-LUMO energy levels of MA-CMP-F and substrates. The geometrical optimizations for model systems of MA-CMP-F (CMP-1, CMP-4 and CMP-P refer to Fig. S5 in the ESI for the definition), TNT, DNT, 4NT, 2NT, 4-chlorotoluene (4CT), toluene (T), and additional toluene derivatives having monosubstituent at para position were carried out within B3LYP/light-tier1 level of theory using FHI-aims code.<sup>6</sup> The convergence criteria were set to  $10^{-2}$  eV/Å except for the CMP-P case. For CMP-P, the PBE/light-tier1 level and  $2 \times 10^{-2}$  eV/Å of relaxation setting were used to conduct the periodic boundary condition (PBC) calculation with full relaxation for both atomic geometries and unit cell parameters, because computational costs for PBC calculations with hybrid functional are enormously expensive. Then, single point calculation at B3LYP/light-tier1 level was performed to estimate the HOMO and LUMO energy levels for CMP-P. It is noted that in a PBC calculation actually the HOMO and LUMO energy levels indicate the valence band maximum and conduction band minimum, respectively. The optimized unit

cell parameters of CMP-P were calculated to be  $21.49 \text{ \AA} \times 16.29 \text{ \AA} \times 35.75 \text{ \AA}$ . The vacuum space of about  $30 \text{ \AA}$  was added along the c-axis to avoid the interactions between 2-dimensional sheets. In addition, single point molar volume calculations at the optimized geometries for TNT, DNT, 4NP and 2NT were carried out to understand the size effect on the sensitivity of experimental sensing behavior using Gaussian 09 package.<sup>7</sup>

Theoretically, it is expected that the LUMO energy levels of MA-CMP-F are located around  $-2.31 \sim -2.89 \text{ eV}$  which can possibly be modulated by the conjugation length of CMP moieties. The calculated relative LUMO energy levels of substrates indicate that the electron transfers from the excited MA-CMP-F to nitrotoluenes including TNT might be favorable to lead fluorescent quenching. On the other hand, the mismatch of LUMO energy levels 4CT and T prevents the induction of emission quenching of CMP materials, which is fully consistent with the experimental fluorescent sensing behavior. It is noteworthy that our DFT results indicate that MA-CMP-F can also be used for the detection of TNT compound. In the experimental results, the sensing efficiencies of MA-CMP-F towards nitrotoluenes were observed in the increasing order of  $\text{DNT} < 2\text{NT} < 4\text{NT}$ . This trend can be analyzed considering both the size and electronic effects of substrates. From the aspect of the diffusion process, we can speculate that smaller substrates (4NT and 2NT) would have higher sensing efficiencies than DNT. (Refer to Fig. S7 in the ESI for the calculated molar volume values and size parameters) In the case of 4NT and 2NT having similar molecular volumes, the calculated LUMO energy level of 4NT is rather lower than that of 2NT. Thus, the 4NT as photo-induced electron acceptor has a better quenching efficiency than 2NT.

## Reference

1. W. Stöber, A. Fink and E. Bohn, *J. Colloid Inter. Sci.* 1968, **26**, 62-69.
2. Y. Xu, D. Chang, S. Feng, C. Zhang and J. -X. Jiang, *New J. Chem.* 2016, **40**, 9415-9423.
3. Y. J. Shin, *MS thesis*, Sungkyunkwan University, 2016.
4. Z. Wang, S. Yuan, A. Mason, B. Reprogle, D. -J. Liu and L. Yu, *Macromolecules* 2012, **45**, 7413-7419.
5. M. H. Kim, T. Song, U. R. Seo, J. U. Park, K. Cho, S. M. Lee, H. J. Kim, Y. -J. Ko, Y. K. Chung and S. U. Son, *J. Mater. Chem. A* 2017, **5**, 23612-23619.
6. V. Blum, R. Gehrke, F. Hanke, P. Havu, V. Havu, X. Ren, K. Reuter and M. Scheffler, *Comput. Phys. Commun.* 2009, **180**, 2175–2196.
7. M. J. Frisch, G. W. Trucks, H. B. Schlegel, G. E. Scuseria, M. A. Robb, J. R. Cheeseman, G. Scalmani, V. Barone, B. Mennucci, G. A. Petersson, H. Nakatsuji, M. Caricato, X. Li, H. P. Hratchian, A. F. Izmaylov, J. Blonino, G. Zheng, J. L. Sonnenberg, M. Hada, M. Ehara, K. Toyota, R. Fukuda, J.; Hasegawa, M. Ishida, T. Nakajima, Y. Honda, O. Kitao, H. Nakai, T. Vreven, Jr. J. A. Montgomery, J. E. Feralta, F. Ogliaro, M. Bearpark, J. J. Heyd, E. Brothers, K. N. Kudin, V. N. Staroverov, T. Keith, R. Kabayashi, J. Normand, K. Raghavachari, A. Rendell, J. C. Burant, S. S. Iyengar, J. Tomasi, M. Cossi, N. Rega, J. M. Millam, M. Klene, J. E. Knox, J. B. Corss, V. Bakken, C. Adamo, J. Jaramillo, R. Gomperts, R. E. Stratmann, O.

Yazyev, A. J. Austin, R. Cammi, C. Pomelli, J. W. Ochterski, R. L. Martin, K. Morokuma, V. G. Zakrzewski, G. A. Voth, P. Salvador, J. J. Dannenberg, S. Dapprich, A. D. Daniels, O. Farkas, J. B. Foresman, J. V. Ortiz, J. Ciosolowski and D. J. Fox, *Gaussian 09, Revision B.01*, Gaussian, Inc., Wallingford CT, 2010.

**Fig. S1** A photograph and SEM images of the 400 nm silica spheres assembled on the glass plate.

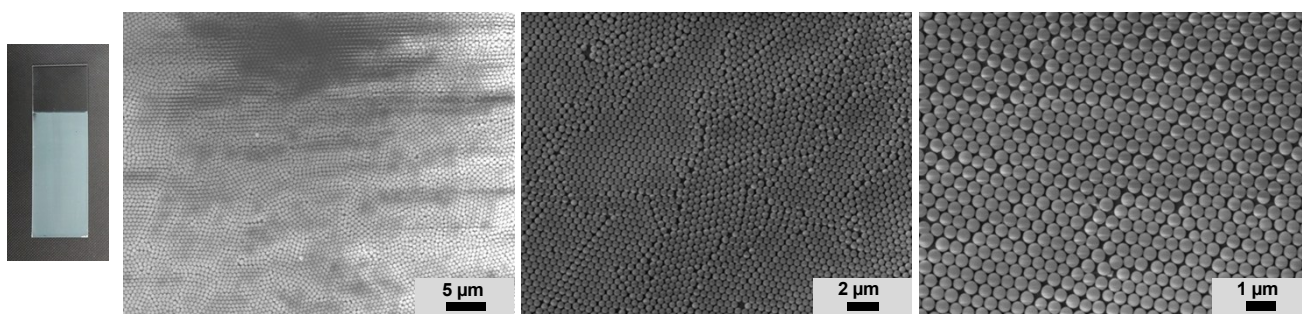

**Fig. S2** Photographs and SEM images of 200 nm and 1.2 μm silica spheres assembled on the glass plate.

200 nm

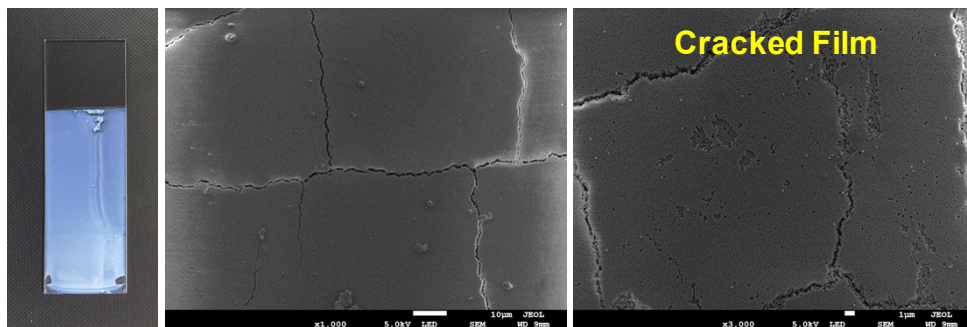

1.2 μm

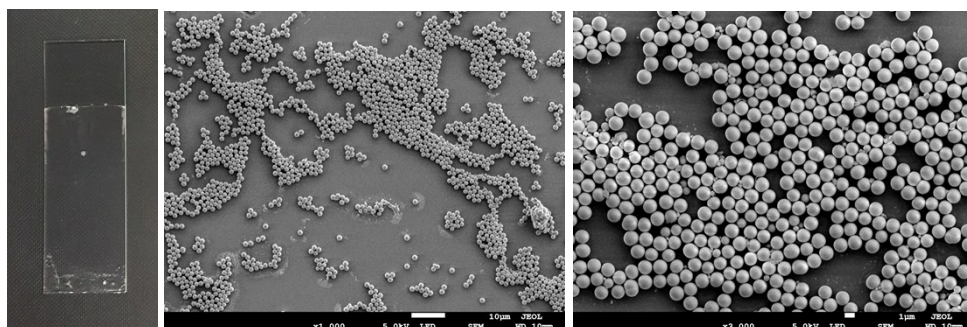

**Fig. S3** Consideration of void space portion in MA-CMP-F induced by the 400 nm silica templates (supposing

the closest packing structure of hollow CMP spheres).

R = radius of silica spheres = 200 nm, a = edge distance of unit cell (nm)

$a = 2 \times 1.414 \times (R + 17.5) \text{ nm}$

Void space percent induced by silica templates

$= \{[\text{Inter sphere void space} + \text{hollow space of 4 hollow spheres}]/\text{unit cell volume}\} \times 100\%$

$= \{[\text{unit cell volume} - \text{volume of 4 hollow CMP spheres} + \text{volume of 4 hollow space}]/\text{unit cell volume}\} \times 100\%$

$= \{[a^3 - 4 \times (4/3) \times \pi (R+17.5)^3 + 4 \times (4/3) \times \pi R^3]/a^3\} \times 100\%$

$= \{[22.63(R+17.5)^3 - 16.76 (R+17.5)^3 + 16.76 R^3]/[22.63(R+17.5)^3]\} \times 100\%$

$= [0.2594 + 0.7406 R^3/(R+17.5)^3] \times 100 \% = 84\%$

**Fig. S4** PXRD patterns of MA-CMP-F and CMP-F.



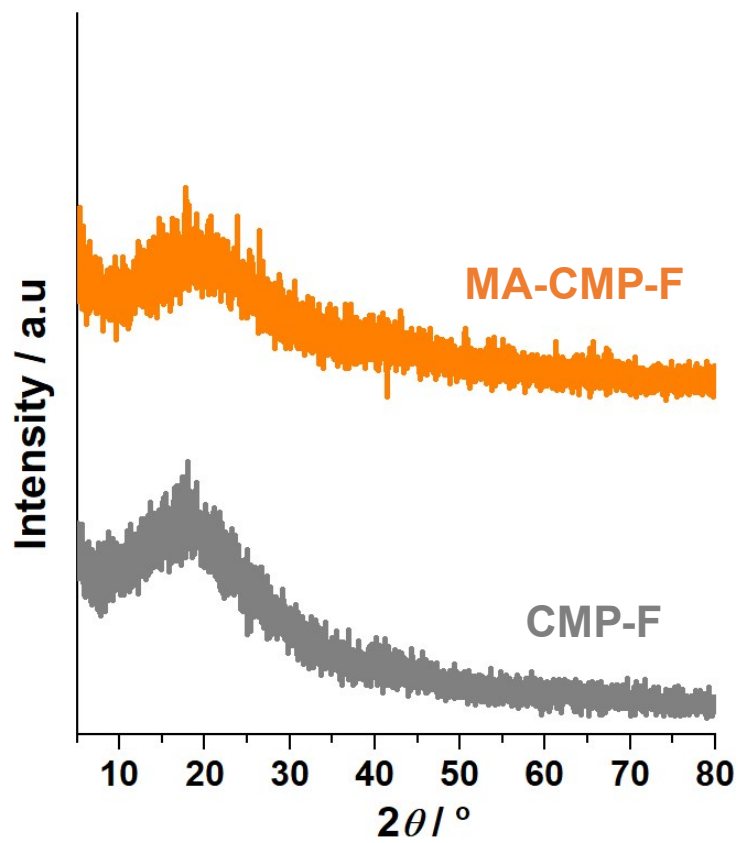

**Fig. S5** Model systems (CMP-1, CMP-4, and CMP-P) of MA-CMP-F used for DFT simulation and their

optimized structures.

|       | Scheme                                                                                               | Optimized structures                                                                |
|-------|------------------------------------------------------------------------------------------------------|-------------------------------------------------------------------------------------|
| CMP-1 | 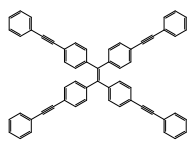                    |   |
| CMP-4 |                     |   |
| CMP-P | <p>Unit cell</p>  |  |

**Fig. S6** The cartesian coordinates (in Å) of optimized geometry for MA-CMP-F model systems.

CMP-1

Table with 4 columns: ID, Value 1, Value 2, Value 3. Contains 100 rows of numerical data.

CMP-4

Table with 4 columns: ID, Value 1, Value 2, Value 3. Contains 100 rows of numerical data.

Table with 4 columns: ID, Value 1, Value 2, Value 3. Contains 100 rows of numerical data.

Table with 4 columns: ID, Value 1, Value 2, Value 3. Contains 100 rows of numerical data.

|   |             |             |             |
|---|-------------|-------------|-------------|
| C | 50.71569330 | 23.60091301 | 23.87260647 |
| C | 50.27785344 | 21.29992503 | 25.37689105 |
| H | 52.16873933 | 21.71663551 | 26.28631534 |
| C | 49.55312927 | 22.86786722 | 23.68421291 |
| C | 50.88453703 | 24.49452766 | 23.28747942 |
| H | 49.31698582 | 21.70409556 | 24.43503356 |
| H | 50.10339614 | 20.40531723 | 25.95725290 |
| H | 48.81814665 | 23.18451072 | 22.95816718 |
| C | 48.12872263 | 20.94823333 | 24.24287652 |
| C | 47.11870038 | 20.30450780 | 24.07603089 |
| C | 45.93584845 | 19.54643881 | 23.87103709 |
| C | 44.98677660 | 19.93780778 | 22.91199478 |
| C | 45.68228529 | 18.38803579 | 24.62029559 |
| C | 43.83552892 | 19.19504900 | 22.71564108 |
| H | 45.16270597 | 20.82981670 | 22.32789517 |
| C | 44.53548070 | 17.64304058 | 24.4082334  |
| H | 46.39404247 | 18.08111994 | 25.37673227 |
| C | 43.59346137 | 18.02176236 | 23.44431432 |
| H | 43.11400862 | 19.52181989 | 21.97956142 |
| H | 44.36360010 | 16.75469841 | 25.0022622  |
| C | 22.53443059 | 31.68948206 | 24.68297952 |
| C | 21.63662762 | 32.27484351 | 24.82539398 |
| H | 11.86747013 | 23.18438818 | 21.54077951 |
| C | 41.00325814 | 31.68033194 | 21.53681382 |
| C | 11.86726416 | 9.93299265  | 24.77203087 |
| C | 41.01264971 | 1.45370727  | 24.79815006 |
| H | 41.91110186 | 0.87068668  | 24.94596659 |
| C | 22.55780378 | 1.40468964  | 21.59856281 |
| C | 51.66059570 | 9.92984758  | 21.48748983 |
| H | 52.56541486 | 9.35535818  | 21.34520943 |
| C | 51.66162849 | 23.19128175 | 24.80856181 |
| H | 52.56668793 | 23.76498797 | 24.95249303 |
| H | 41.90256543 | 32.26392672 | 21.39645813 |
| H | 10.96119574 | 23.75832244 | 21.40575515 |
| H | 10.96093971 | 9.36068228  | 24.91111180 |
| H | 21.66136683 | 0.81694860  | 21.45737502 |

**CMP-P**

|   |             |            |             |
|---|-------------|------------|-------------|
| C | 10.63075739 | 8.70591649 | 19.58547846 |
| C | 10.62646535 | 7.33218841 | 19.58449560 |
| C | 9.37298037  | 6.53257770 | 19.52672885 |

|   |              |             |             |
|---|--------------|-------------|-------------|
| C | 9.18734058   | 5.47124813  | 20.43600276 |
| C | 8.35517687   | 6.78733431  | 18.58716284 |
| C | 8.01633472   | 4.73345199  | 20.45609384 |
| C | 7.18056724   | 6.04404104  | 18.58277872 |
| C | 6.97604475   | 5.01423826  | 19.52930880 |
| C | 11.87596792  | 6.52627842  | 19.64151282 |
| C | 12.06073785  | 5.47034557  | 18.72589742 |
| C | 12.89060212  | 6.77073994  | 20.58695745 |
| C | 13.23540810  | 4.72908816  | 18.70952155 |
| C | 14.06276279  | 6.02348210  | 20.59032846 |
| C | 14.26746095  | 5.00051274  | 19.63644675 |
| C | 11.88445746  | 9.50497164  | 19.52589878 |
| C | 12.07545304  | 10.56098997 | 20.44046187 |
| C | 12.89700757  | 9.25457253  | 18.57976609 |
| C | 13.25360260  | 11.29672069 | 20.45424745 |
| C | 14.07208745  | 9.99707622  | 18.7349108  |
| C | 14.28263307  | 11.02048122 | 19.52549946 |
| C | 9.28198596   | 9.51290226  | 18.45659002 |
| C | 9.19661861   | 10.56918763 | 19.36066729 |
| C | 8.6926871    | 9.26979107  | 20.59387949 |
| C | 8.02303607   | 11.31219767 | 18.71745487 |
| C | 7.19829476   | 10.01892325 | 20.60018626 |
| C | 6.99284935   | 11.04236880 | 19.64684879 |
| C | 5.78490362   | 11.78026679 | 19.61539652 |
| C | 4.74056990   | 12.41600829 | 19.56871390 |
| C | 5.76579086   | 4.28011334  | 19.56136664 |
| C | 4.72043563   | 3.64618728  | 19.60998839 |
| C | 15.47620306  | 4.26403539  | 19.60226822 |
| C | 16.522059215 | 3.62898557  | 19.54816146 |
| C | 15.49414380  | 11.75263704 | 19.55529381 |
| C | 16.53997768  | 12.38557780 | 19.60636791 |
| C | 17.72811456  | 2.89079223  | 19.51014950 |
| C | 18.76361300  | 3.15513873  | 20.43593310 |
| C | 17.92692320  | 1.86851452  | 18.5426068  |
| C | 19.83439651  | 2.40926556  | 20.41495182 |
| C | 19.09568950  | 1.11593503  | 18.55321052 |
| C | 20.11411097  | 1.35500229  | 19.49607958 |
| C | 3.51185063   | 2.90918003  | 19.63847171 |
| C | 2.47982687   | 3.18437611  | 18.17289386 |
| C | 3.30902052   | 1.87865214  | 20.58483490 |
| C | 1.30714297   | 2.43968713  | 18.72330065 |
| C | 2.13909797   | 1.12802209  | 20.57562381 |
| C | 1.12417012   | 1.37606927  | 19.63148886 |
| C | 3.53233182   | 13.15357550 | 19.54110960 |
| C | 3.33067129   | 14.18996925 | 18.60083487 |

|   |             |             |             |
|---|-------------|-------------|-------------|
| C | 2.49901398  | 12.87175358 | 20.46306755 |
| C | 2.15993010  | 14.93911036 | 18.61227645 |
| C | 1.32574812  | 13.61529315 | 20.45517266 |
| C | 1.14346168  | 14.68348337 | 19.55307967 |
| C | 17.74802565 | 13.12312550 | 19.64186836 |
| C | 17.95236631 | 14.14124920 | 20.60122174 |
| C | 18.77764034 | 12.86137741 | 18.79666879 |
| C | 19.12137651 | 14.89334418 | 20.59844568 |
| C | 19.94930560 | 13.60742514 | 18.72622621 |
| C | 20.13360542 | 14.65826746 | 19.64797582 |
| C | 21.38348345 | 15.46402686 | 19.59428849 |
| C | 21.36462671 | 0.55016831  | 19.54587578 |
| H | 9.97582260  | 5.24021398  | 21.15456864 |
| H | 8.48845393  | 7.58614323  | 17.85689613 |
| H | 7.87017360  | 3.93409747  | 21.17910348 |
| H | 6.40031398  | 6.25677835  | 17.85160532 |
| H | 11.27319248 | 5.24608858  | 18.00354636 |
| H | 12.75771401 | 7.56527714  | 21.32231389 |
| H | 13.37500343 | 3.92236850  | 17.97809512 |
| H | 14.84143597 | 6.22725695  | 21.32604707 |
| H | 11.29027787 | 10.78911042 | 21.16360553 |
| H | 12.76050114 | 8.45716108  | 17.84851571 |
| H | 13.39833960 | 12.09248680 | 21.18586713 |
| H | 14.84944372 | 9.78926696  | 17.83779134 |
| H | 9.98259754  | 10.79141772 | 18.00655907 |
| H | 8.50306005  | 8.47510779  | 21.32895883 |
| H | 7.88272344  | 12.10900595 | 17.98627140 |
| H | 6.42130645  | 9.81633601  | 21.33802973 |
| H | 18.62770927 | 3.94834109  | 21.17201655 |
| H | 17.14490253 | 1.66929167  | 17.82114208 |
| H | 20.72371580 | 2.62869107  | 21.13624243 |
| H | 19.22062082 | 0.23015326  | 17.81816373 |
| H | 2.61707411  | 3.98637383  | 17.98680532 |
| H | 4.08768169  | 1.67190378  | 21.31973669 |
| H | 0.51960520  | 2.66696512  | 18.00244281 |
| H | 2.00760975  | 0.2823309   | 21.30555630 |
| H | 4.11217223  | 14.40265722 | 17.87090568 |
| H | 2.63575154  | 12.06498793 | 21.18390525 |
| H | 2.03010078  | 15.74489247 | 17.88903815 |
| H | 0.53655607  | 13.38393509 | 21.17286664 |
| H | 17.17522436 | 14.33675815 | 21.34078771 |
| H | 18.63931797 | 12.06874680 | 17.97356402 |
| H | 19.25431797 | 15.68333010 | 21.33871159 |
| H | 20.73506814 | 13.39082153 | 18.00016368 |

**Fig. S7** The calculated molar volumes (in  $\text{cm}^3/\text{mol}$ ) and size parameters of nitrotoluene substrates (TNT, DNT,

4NP and 2NT) at B3LYP/6-31+G(d,p) level of theory with Gaussian 09 packages.

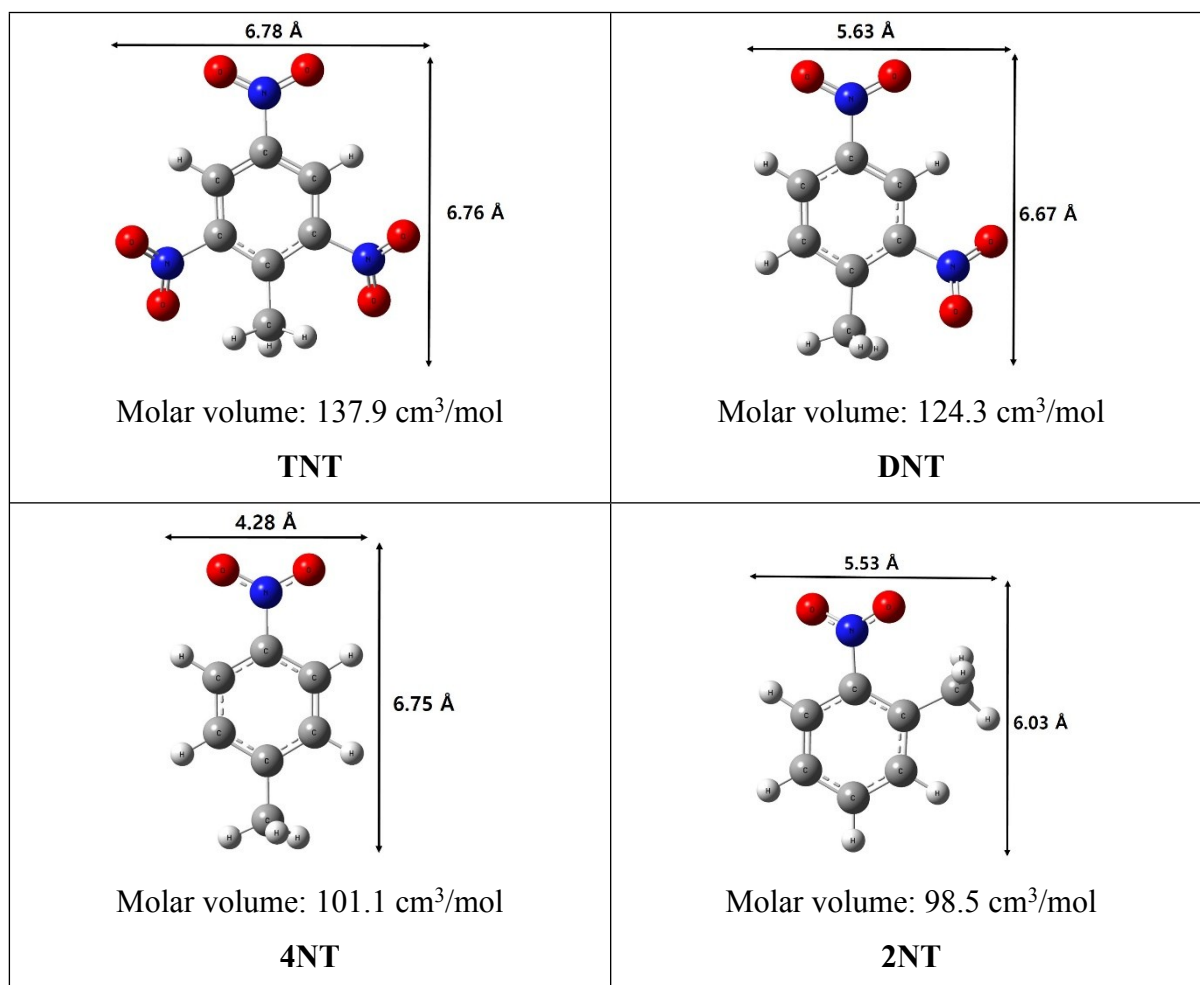

**Fig. S8** The Stern-Volmer plots ( $I_0/I$  vs  $[M]$ ) of the emission quenching of MA-CMP-F and CMP-F by 4NT,

2NT, and DNT.

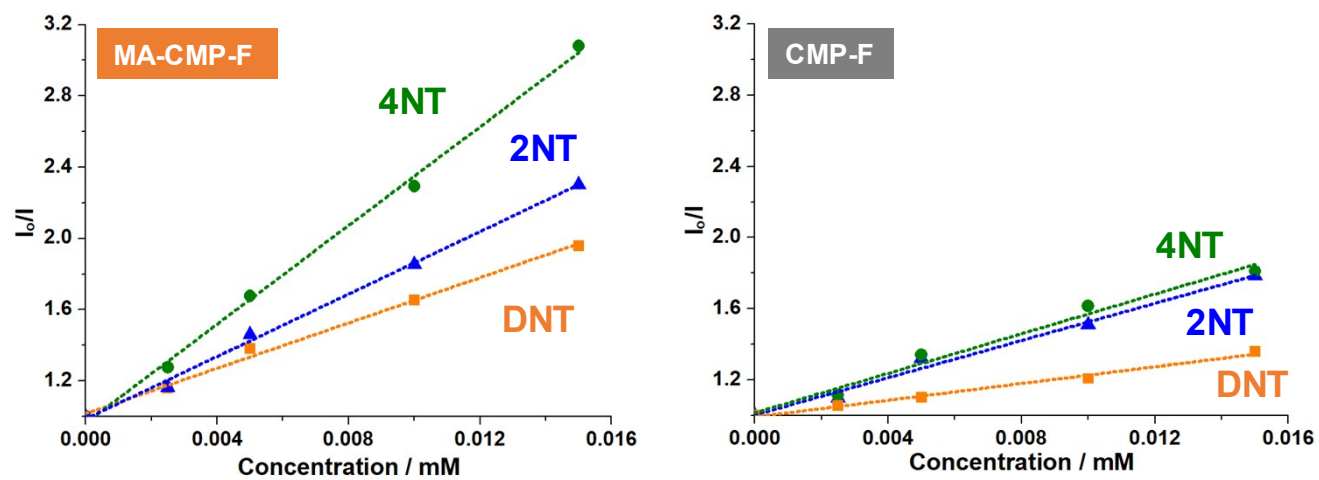

Fig. S9 Low magnification SEM image of MA-CMP-F recovered after the fifth recycle tests.

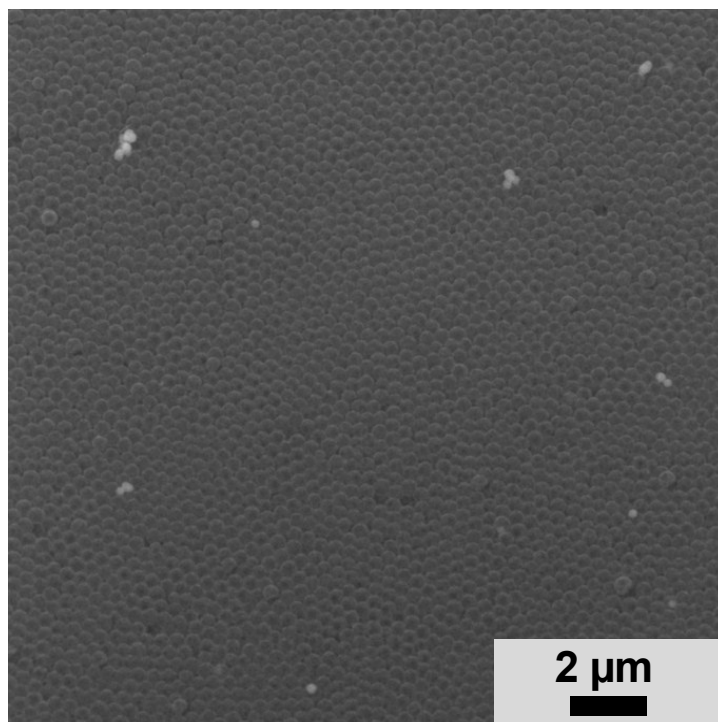

**Fig. S10** Photographs of emission quenching of MA-CMP-F by 4NT.

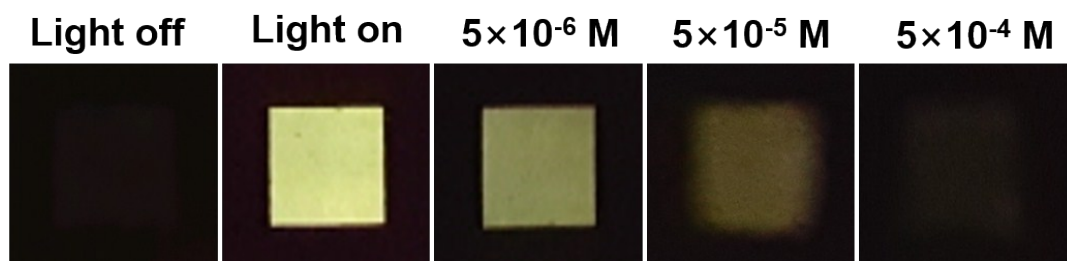

**Fig. S11** The simulated HOMO and LUMO energy levels of additional toluene derivatives.



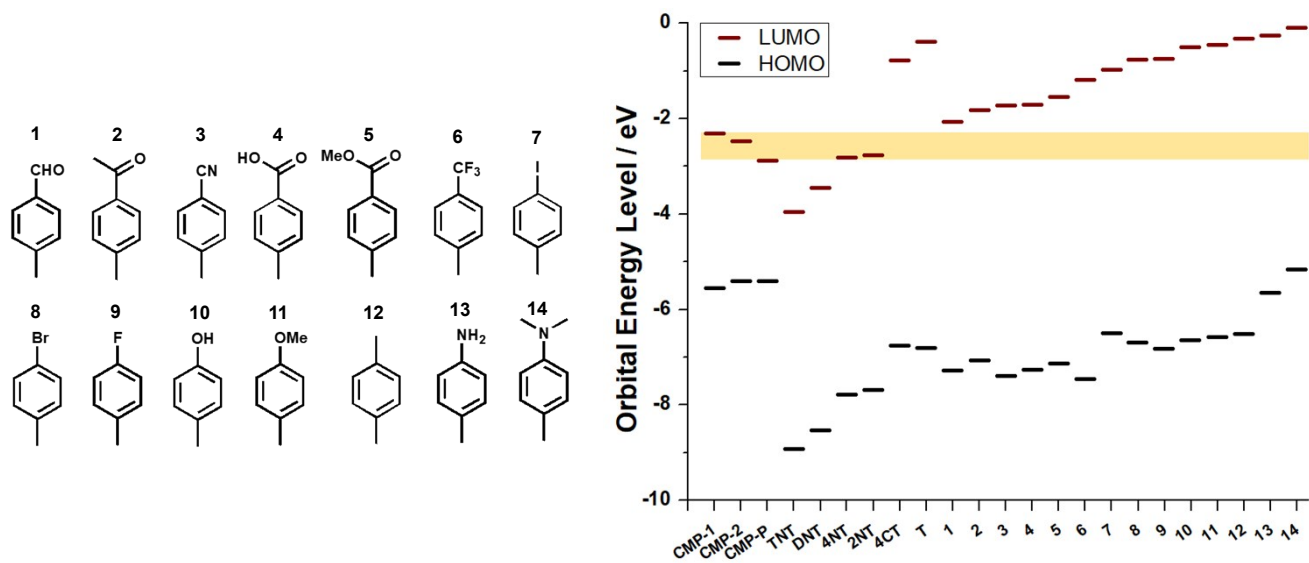

| Entry | Systems      | LUMO level (eV) | HOMO level (eV) | Entry | Systems   | LUMO level (eV) | HOMO level (eV) |
|-------|--------------|-----------------|-----------------|-------|-----------|-----------------|-----------------|
| 1     | <b>CMP-1</b> | -2.31           | -5.55           | 13    | <b>4</b>  | -1.71           | -7.26           |
| 2     | <b>CMP-2</b> | -2.47           | -5.40           | 14    | <b>5</b>  | -1.54           | -7.13           |
| 3     | <b>CMP-P</b> | -2.89           | -5.40           | 15    | <b>6</b>  | -1.18           | -7.45           |
| 4     | <b>TNT</b>   | -3.96           | -8.92           | 16    | <b>7</b>  | -0.98           | -6.50           |
| 5     | <b>DNT</b>   | -3.44           | -8.53           | 17    | <b>8</b>  | -0.77           | -6.69           |
| 6     | <b>4NT</b>   | -2.82           | -7.78           | 18    | <b>9</b>  | -0.74           | -6.82           |
| 7     | <b>2NT</b>   | -2.77           | -7.68           | 19    | <b>10</b> | -0.50           | -6.64           |
| 8     | <b>4CT</b>   | -0.78           | -6.76           | 20    | <b>11</b> | -0.46           | -6.58           |
| 9     | <b>T</b>     | -0.39           | -6.80           | 21    | <b>12</b> | -0.32           | -6.51           |
| 10    | <b>1</b>     | -2.07           | -7.27           | 22    | <b>13</b> | -0.26           | -5.65           |
| 11    | <b>2</b>     | -1.82           | -7.07           | 23    | <b>14</b> | -0.09           | -5.17           |
| 12    | <b>3</b>     | -1.72           | -7.38           |       |           |                 |                 |

**Fig. S12 (a-c)** The emission quenching behavior of MA-CMP-F in ethanol by O<sub>2</sub> and NO<sub>2</sub> in nitrogen (the S17

gases were bubbled into ethanol solution before measurements.) (d-e) The influence of O<sub>2</sub> and NO<sub>2</sub> in the emission quenching of MA-CMP-F in ethanol by 4NT (0.015 mM).

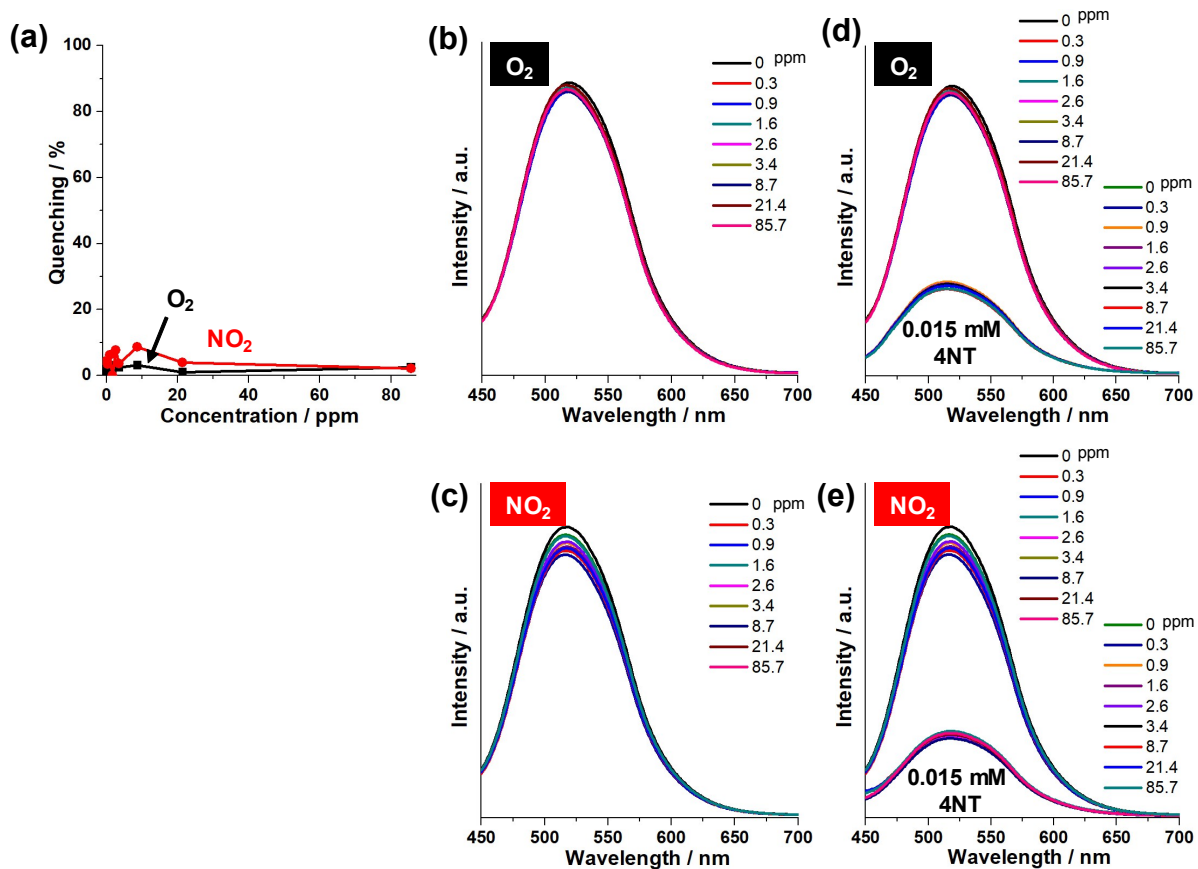

**Fig. S13** (a) The emission quenching behavior of MA-CMP-F in ethanol by tetrabutylammonium perchlorate

and nitrate and (b) the Stern-Volmer plots.

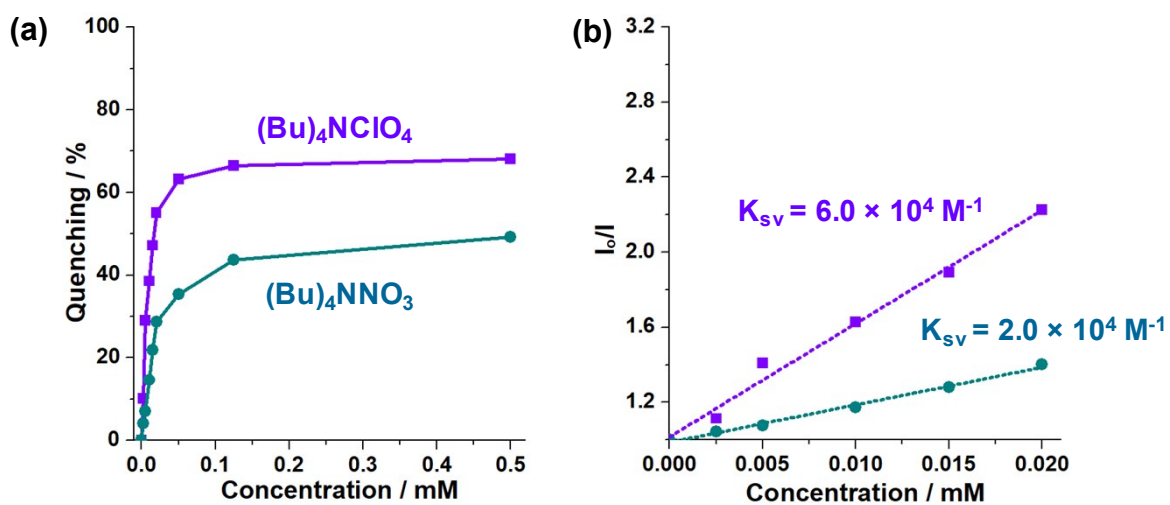

Fig. S14 (a) UV/vis absorption and (b) IR spectra of MA-CMP-F containing metal-free porphyrin and Cr-F  
S19

porphyrin moieties. In UV/vis absorption spectra, the Q band peak of MA-CMP-F with metal-free porphyrins appeared at 655 nm (indicated by asterisk), confirming the metal-free porphyrin species. In IR spectra, the vibration peak of MA-CMP-F with Cr-F porphyrins appeared at 1010  $\text{cm}^{-1}$ , indicating the Cr-porphyrin species. For the synthetic details, refer to experimental procedures in the ESI.

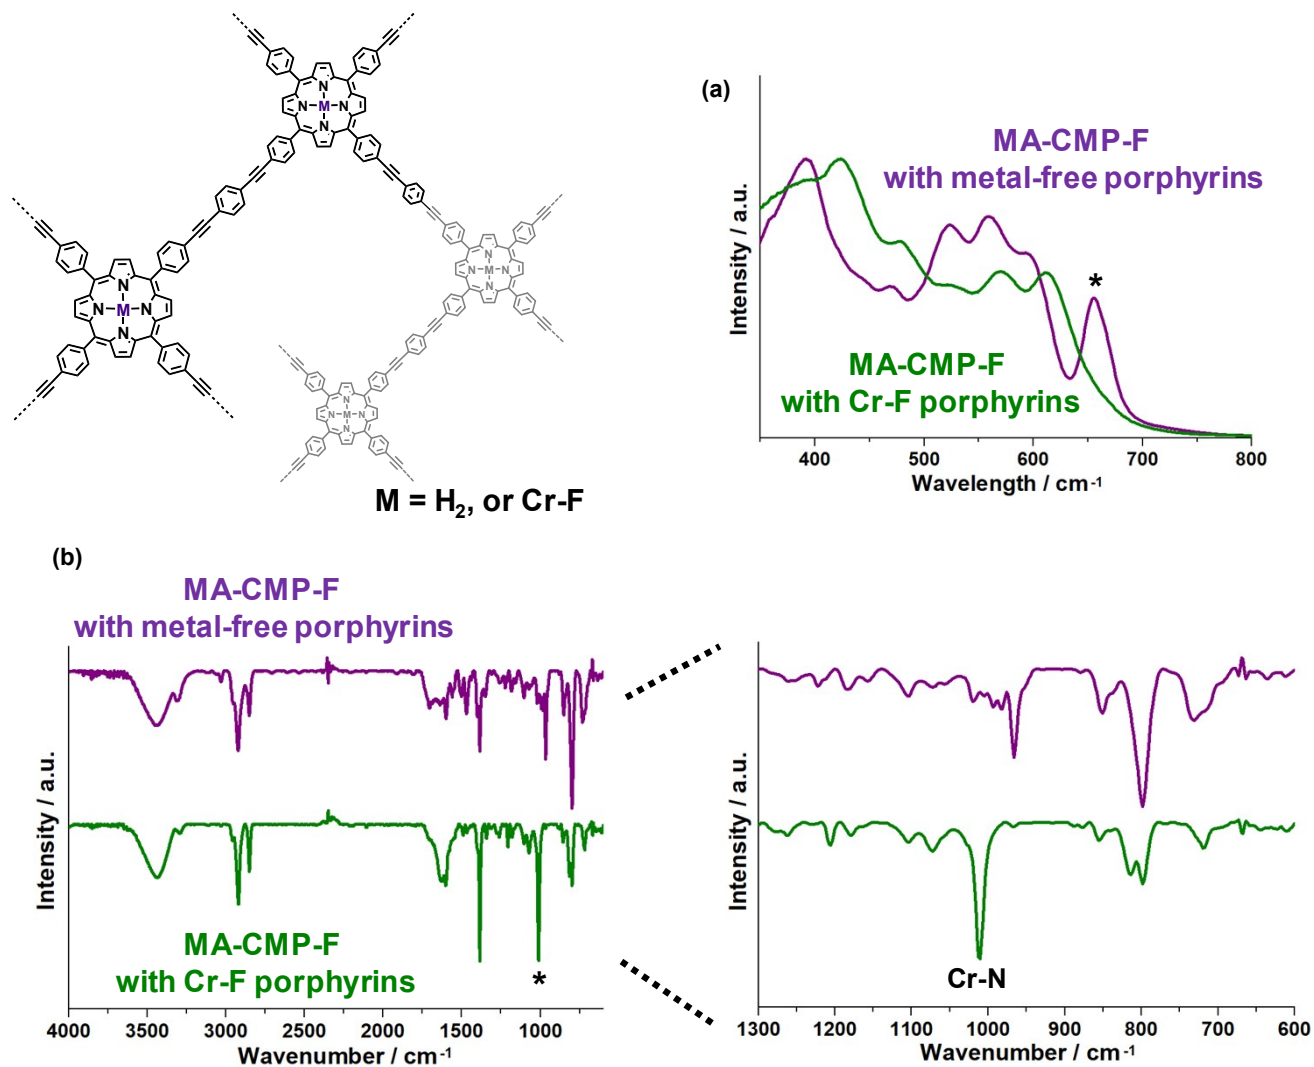

**Table S1** Comparison of the sensing performance of MA-CMP-F with the results (best  $K_{sv}$  value) of emissive

CMP materials in the literature. TNP=2,4,6-trinitrophenol, TNB=1,3,6-trinitrobenzene, DNT=2,4-dinitrotoluene, TNT=2,4,6-trinitrotoluene, 2NP=2-nitrophenol, 4NT=4-nitrotoluene.

| Entry | Materials                                                   | Substrate | Solvent                   | ex       | $K_{sv}$<br>( $M^{-1}$ ) | ref       |
|-------|-------------------------------------------------------------|-----------|---------------------------|----------|--------------------------|-----------|
| 1     | Microporous organic polymer with Troger base and TPEs       | TNP       | ethanol                   | 380      | <b>26000</b>             | 17        |
| 2     | Nanoporous polymers with silsesquioxane and TPEs            | -         | chloroform                | 350      | -                        | 18        |
| 2     | Dynamic covalent imine get                                  | TNP       | water                     | 469      | <b>32220</b>             | 19        |
| 3     | Microporous polymer films with carbazole, thiophene, TPE    | TNB       | acetonitrile              | 340      | <b>67800</b>             | 20        |
| 4     | Nanofibrous PTBPE/PLA films                                 | TNB       | vapor                     | 394, 380 | -                        | 21        |
| 5     | Porous polymer films with carbazole and TPE                 | TNP       | acetonitrile              | 331      | <b>64000</b>             | 22        |
| 6     | Porous polymer films with carbazole and TPE                 | DNT       | acetonitrile              | 331      | <b>790</b>               | 22        |
| 7     | Conjugated porous polymer film                              | TNT       | vapor                     | 396      | -                        | 23        |
| 8     | Conjugated microporous polymers with carbazole derivatives  | DNT       | acetonitrile              | 368      | <b>5900</b>              | 31        |
| 9     | Covalent organic polymer                                    | TNP       | THF                       | 365      | <b>14500</b>             | 32        |
| 10    | Microporous organic polymers containing ethenylphenyl unit  | TNP       | THF: H <sub>2</sub> O=9:1 | 365      | -                        | 33        |
| 11    | Carbazole based conjugated microporous polymer              | 4NT       | THF                       | 380      | <b>4300</b>              | 34        |
| 12    | Porous hyperbranched conjugated polymer with triphenylamine | TNT       | THF                       | 353      | <b>1380</b>              | 35        |
| 13    | Sn-porphyrin network film                                   | TNP       | water                     | 422      | <b>24000</b>             | 36        |
| 14    | Covalent organic polymer                                    | TNT       | methanol                  | 365      | <b>2271</b>              | 37        |
| 15    | Highly cross-linked polymer with curcumins                  | TNP       | methanol                  | 372      | <b>15200</b>             | 38        |
| 16    | Hollow microporous organic network                          | TNP       | THF:H <sub>2</sub> O=1:2  | 440      | <b>15000</b>             | 39        |
| 17    | Conjugated porous polymer with carbazole and triphenylamine | 2NP       | dioxane                   | 510      | <b>61200</b>             | 40        |
| 18    | Conjugated microporous polymers with fluorescein            | TNP       | THF                       | 500      | <b>2080</b>              | 41        |
| 19    | MA-CMP-F                                                    | 4NT       | ethanol                   | 410      | <b>138600</b>            | This work |
